# Supplementary material
Source: HighWire-hosted journal article supplement (https://www.cmajopen.ca/highwire/filestream/80757/field_highwire_adjunct_files/0/open-2013-0037-1-at.pdf)
Supplement: open-2013-0037-1-at.pdf [file open-2013-0037-1-at.pdf]

## Appendix 1: Mean cost estimates over a first year and 5-year period of follow-up after diagnosis of prostate cancer by specific treatment and time to treatment initiation; US and Canadian cost estimates.

\*in US dollars; \*\* in Canadian dollars; Exchange rate: 1 CAD = 0.974 US (Bank of Canada, March 11<sup>th</sup>, 2013); Values are obtained from the model integrating assumptions derived from Keegan et al.<sup>1</sup> (Table 5 in the main article)

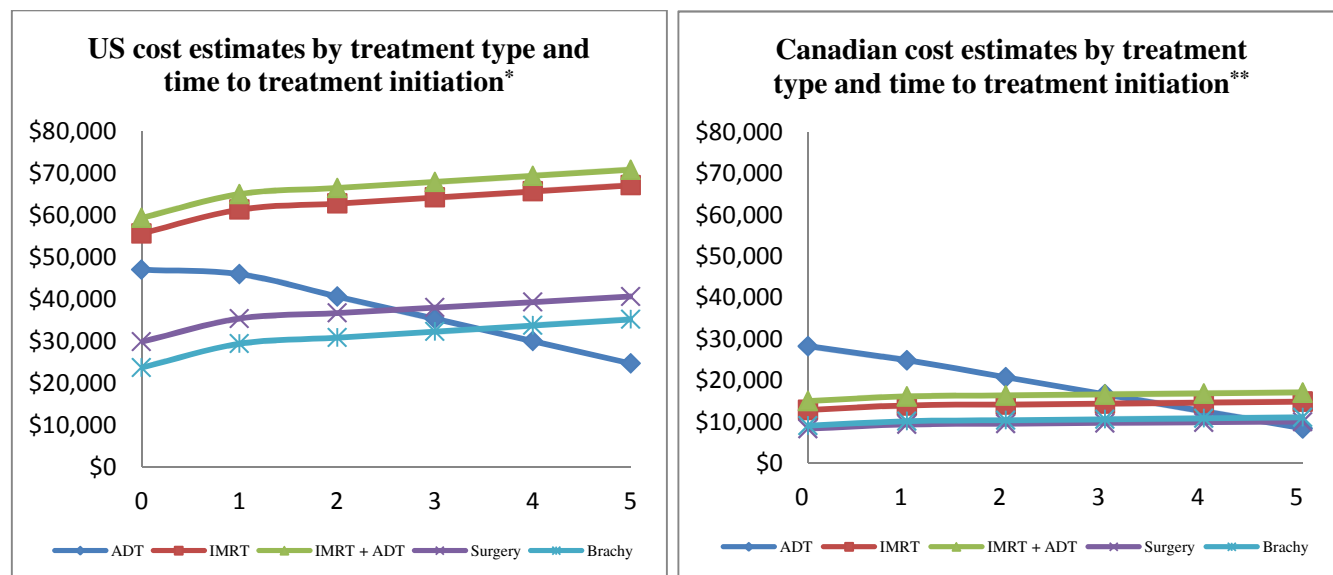

## Reference

1. Keegan KA, Dall'Era MA, Durbin-Johnson B, et al. Active surveillance for prostate cancer compared with immediate treatment: an economic analysis. *Cancer* 2012;118:3512-8.
